# Supplementary material
Source: PubMed Central journal article supplement (PMC10023489)
Supplement: NIHMS1875306-supplement-Suppl_Figure.pdf [file NIHMS1875306-supplement-Suppl_Figure.pdf]

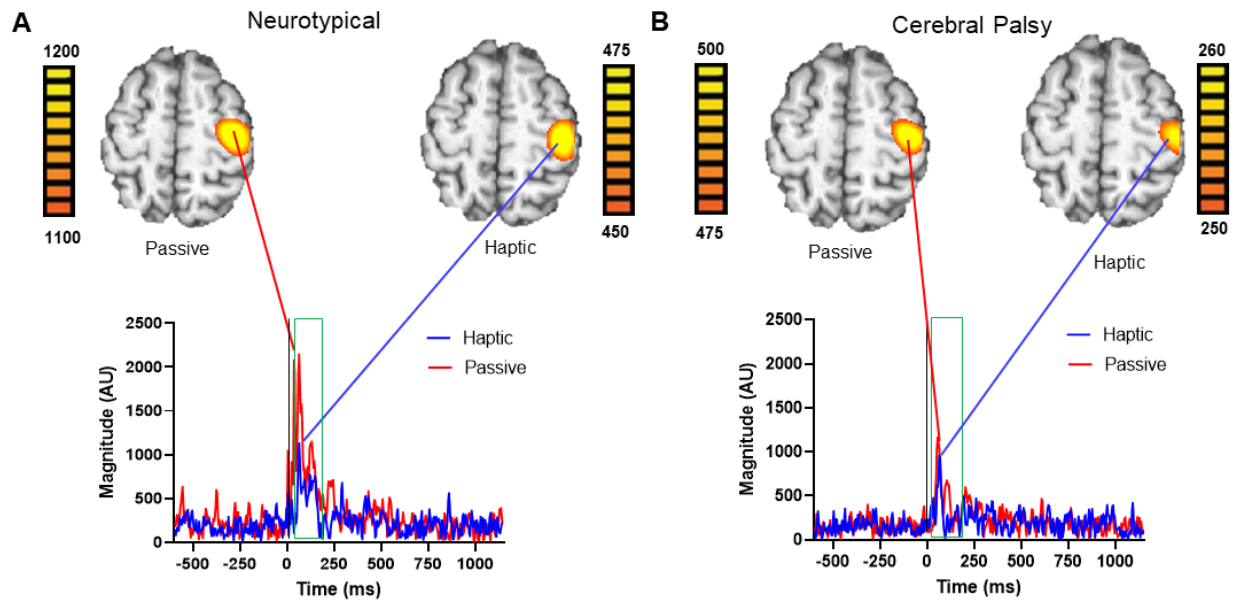

**Supplementary Figure 1:** Somatosensory cortical activity in representative subjects. A.) Brain images depicting the somatosensory cortical activity in the haptic and passive conditions for a representative neurotypical (NT) subject with the respective time series depicted below. The neural time course depicts the somatosensory cortical activity within the passive (red) and haptic (dark blue) conditions. The green box denotes the time window analyzed (28 – 168 ms), with the stimulation onset being at time zero, represented by a vertical black line. B.) Brain images depicting the somatosensory cortical activity in the haptic and passive conditions for a representative subject with cerebral palsy (CP) with the respective timeseries depicted below. The neural time course depicts the somatosensory cortical activity within the passive (red) and haptic (blue) conditions. The green box denotes the time window analyzed (28 – 168 ms), with the stimulation onset being at time zero, represented by a vertical black line. It should be noted that the scale bars shown in this figure are different across the respective brain images shown in panels A and B. This was done to highlight the precise anatomical location of the source activity in the individual images. Hence, the magnitude of the scale bars should be used when interpreting if the source activity was weaker or stronger across the displayed individuals and conditions.
